# Supplementary material for: Highly selective production of bio-jet fuel grade alkanes over an Fe/SiO2–Al2O3 solid acid catalyst under solvent-free conditions
Source: Royal Society of Chemistry journal article supplement (doi:10.1039/d3se00144j), 2023-01-01
Supplement: d3se00144j1.pdf [file d3se00144j1.pdf]

## ELECTRONIC SUPPLEMENTARY INFORMATION

### Highly selective production of bio-jet fuel grade alkanes over Fe/ SiO<sub>2</sub>-Al<sub>2</sub>O<sub>3</sub> solid acid catalyst under solvent-free conditions

Bhagirath Saini <sup>a</sup>, Meena Yadav<sup>a</sup>, Shubham Kumar Jha<sup>a</sup>, R. Krishnapriya<sup>b</sup>, Preeti Kang <sup>a</sup>, Vishav Kant <sup>a</sup>, Rahul Singhal <sup>c</sup>, Rakesh K Sharma <sup>a\*</sup>

<sup>a</sup> Sustainable Materials and Catalysis Research Laboratory (SMCRL), Department of Chemistry, Indian Institute of Technology Jodhpur, Jodhpur, Rajasthan India-342037

<sup>b</sup> Mechanical and Aerospace Engineering Department, College of Engineering, United Arab Emirates University, Al Ain 15551, UAE

<sup>c</sup> Department of Physics and Engineering Physics, Central Connecticut State University, New Britain, CT, 06050, USA

\* Corresponding author

Prof. Rakesh K Sharma

Mailing address: Department of Chemistry, Indian Institute of Technology Jodhpur, Jodhpur, Rajasthan India-342037; Tel.: +91 9636133385; E-mail: [rks@iitj.ac.in](mailto:rks@iitj.ac.in)

#### Table of contents

|                     |                                                                                                                                                                                  |
|---------------------|----------------------------------------------------------------------------------------------------------------------------------------------------------------------------------|
| <b>Table S1</b>     | SEM-EDS elemental analysis data for SiO <sub>2</sub> /Al <sub>2</sub> O <sub>3</sub> containing different Fe loads.                                                              |
| <b>Figure S1-S5</b> | SEM-EDS elemental mapping of pristine SiO <sub>2</sub> -Al <sub>2</sub> O <sub>3</sub> and 4-10wt% Fe/SiO <sub>2</sub> -Al <sub>2</sub> O <sub>3</sub> catalyst.                 |
| <b>Table S2</b>     | BET analysis surface area and porosity of Fe-loaded SiO <sub>2</sub> -Al <sub>2</sub> O <sub>3</sub> samples.                                                                    |
| <b>Figure S6</b>    | Nitrogen adsorption-desorption isothermal of SiO <sub>2</sub> /Al <sub>2</sub> O <sub>3</sub> .                                                                                  |
| <b>Figure S7</b>    | Temperature-programmed desorption of ammonia (NH <sub>3</sub> -TPD) profiles of 10wt% SiO <sub>2</sub> -Al <sub>2</sub> O <sub>3</sub> .                                         |
| <b>Figure S8</b>    | GC chromatogram of 10% Fe/SiO <sub>2</sub> /Al <sub>2</sub> O <sub>3</sub> catalyst at optimized reaction conditions (Entry 5).                                                  |
| <b>Figure S9</b>    | GC chromatograms of 10% Fe/SiO <sub>2</sub> -Al <sub>2</sub> O <sub>3</sub> catalyst at 1, 3 and 5 hours.                                                                        |
| <b>Figure S10</b>   | GC chromatograms of 10% Fe/SiO <sub>2</sub> -Al <sub>2</sub> O <sub>3</sub> catalyst at 400°C.                                                                                   |
| <b>Figure S11</b>   | GC chromatograms of 10% Fe/SiO <sub>2</sub> -Al <sub>2</sub> O <sub>3</sub> catalyst at 3, 5 and 8 bar.                                                                          |
| <b>Figure S12</b>   | GC chromatograms of pure Linseed FAME and Neem FAME (red) and after hydrotreatment using 10% Fe/SiO <sub>2</sub> -Al <sub>2</sub> O <sub>3</sub> (Blue) at 380°C, 5 bar for 5h.  |
| <b>Table S13</b>    | GC chromatograms of pure Rapeseed FAME and Tung FAME (red) and after hydrotreatment using 10% Fe/SiO <sub>2</sub> -Al <sub>2</sub> O <sub>3</sub> (Blue) at 380°C, 5 bar for 5h. |

|                   |                                                                                                                                         |
|-------------------|-----------------------------------------------------------------------------------------------------------------------------------------|
| <b>Figure S3</b>  | The major compositions of palm oil, Repeseed, Linseed, Neem, Soyabeen, Sunflower and Corn oil.                                          |
| <b>Figure S14</b> | GC chromatogram of 10% Fe SiO <sub>2</sub> /Al <sub>2</sub> O <sub>3</sub> catalyst at optimized reaction conditions (Entry 5).         |
| <b>Figure S15</b> | Nitrogen adsorption-desorption isothermal of SiO <sub>2</sub> /Al <sub>2</sub> O <sub>3</sub> .                                         |
| <b>Figure S16</b> | HRMS spectra of the pure methyl oleate spectra.                                                                                         |
| <b>Figure S17</b> | HRMS spectra of 10% Fe/SiO <sub>2</sub> -Al <sub>2</sub> O <sub>3</sub> catalyst at 5 h of reaction condition.                          |
| <b>Figure S18</b> | <sup>1</sup> H NMR of the of catalytic hydrotreatment reaction using 10% Fe/SiO <sub>2</sub> -Al <sub>2</sub> O <sub>3</sub> catalyst.  |
| <b>Figure S19</b> | <sup>13</sup> C NMR of the of catalytic hydrotreatment reaction using 10% Fe/SiO <sub>2</sub> -Al <sub>2</sub> O <sub>3</sub> catalyst. |

Table S1: SEM-EDS elemental analysis data for SiO<sub>2</sub>/Al<sub>2</sub>O<sub>3</sub> containing different Fe loads.

| Elements | 4% Fe/SiO <sub>2</sub> /Al <sub>2</sub> O <sub>3</sub> |         | 6% Fe/SiO <sub>2</sub> /Al <sub>2</sub> O <sub>3</sub> |         | 8% Fe/SiO <sub>2</sub> /Al <sub>2</sub> O <sub>3</sub> |         | 10% Fe/ SiO <sub>2</sub> /Al <sub>2</sub> O <sub>3</sub> |         |
|----------|--------------------------------------------------------|---------|--------------------------------------------------------|---------|--------------------------------------------------------|---------|----------------------------------------------------------|---------|
|          | Weight%                                                | Atomic% | Weight%                                                | Atomic% | Weight%                                                | Atomic% | Weight%                                                  | Atomic% |
| O K      | 51.24                                                  | 65.99   | 50.84                                                  | 65.99   | 54                                                     | 68.85   | 53.81                                                    | 70.42   |
| Al K     | 2.92                                                   | 2.16    | 2.81                                                   | 1.94    | 2.27                                                   | 1.71    | 1.95                                                     | 1.45    |
| Si K     | 42.01                                                  | 30.04   | 40.31                                                  | 29.84   | 36.27                                                  | 26.68   | 34.5                                                     | 24.58   |
| Fe K     | 3.83                                                   | 1.43    | 6.04                                                   | 2.23    | 7.47                                                   | 2.76    | 9.74                                                     | 3.55    |

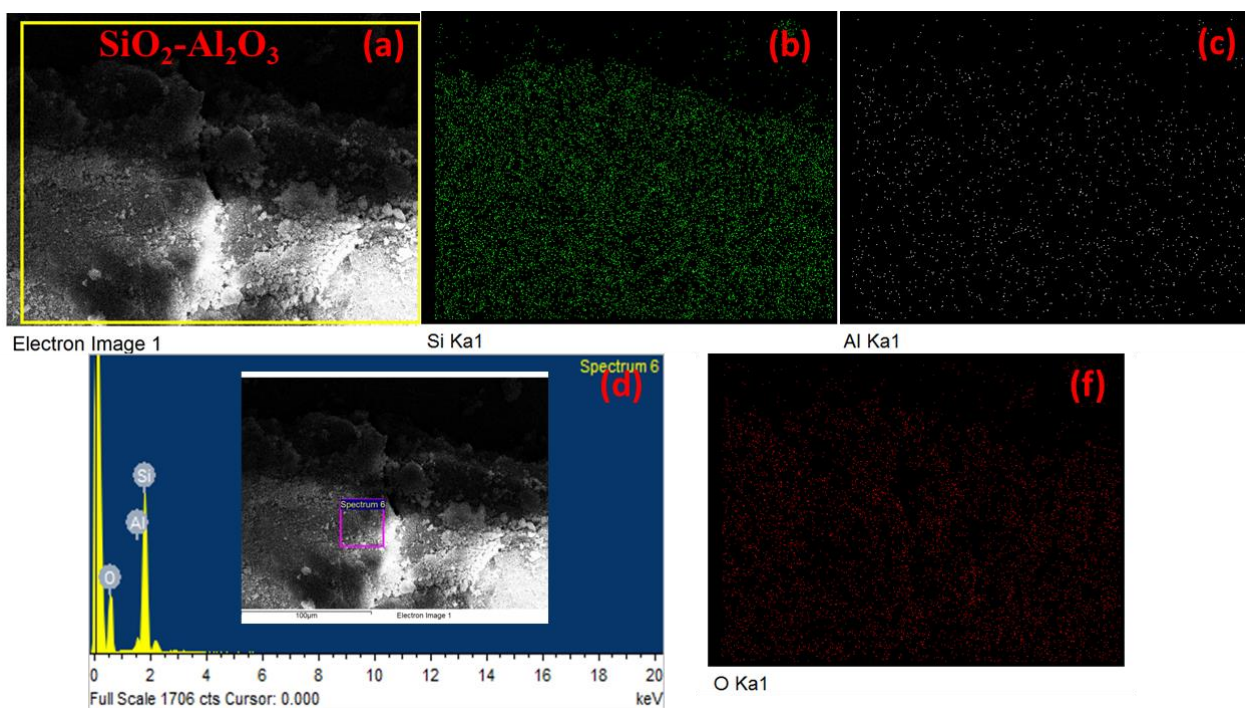

Figure S1: SEM-EDS elemental mapping of pristine SiO<sub>2</sub>-Al<sub>2</sub>O<sub>3</sub> catalyst.

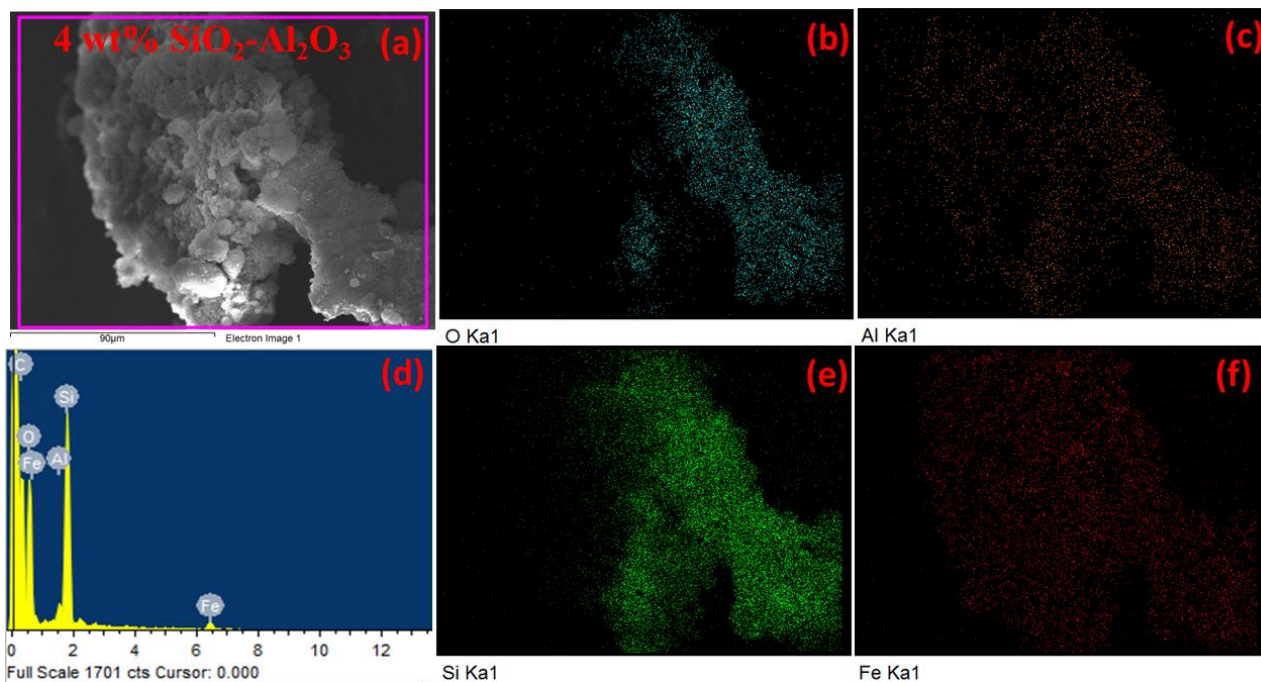

Figure S2: SEM-EDS elemental mapping of 4 wt% Fe/SiO<sub>2</sub>-Al<sub>2</sub>O<sub>3</sub> catalyst.

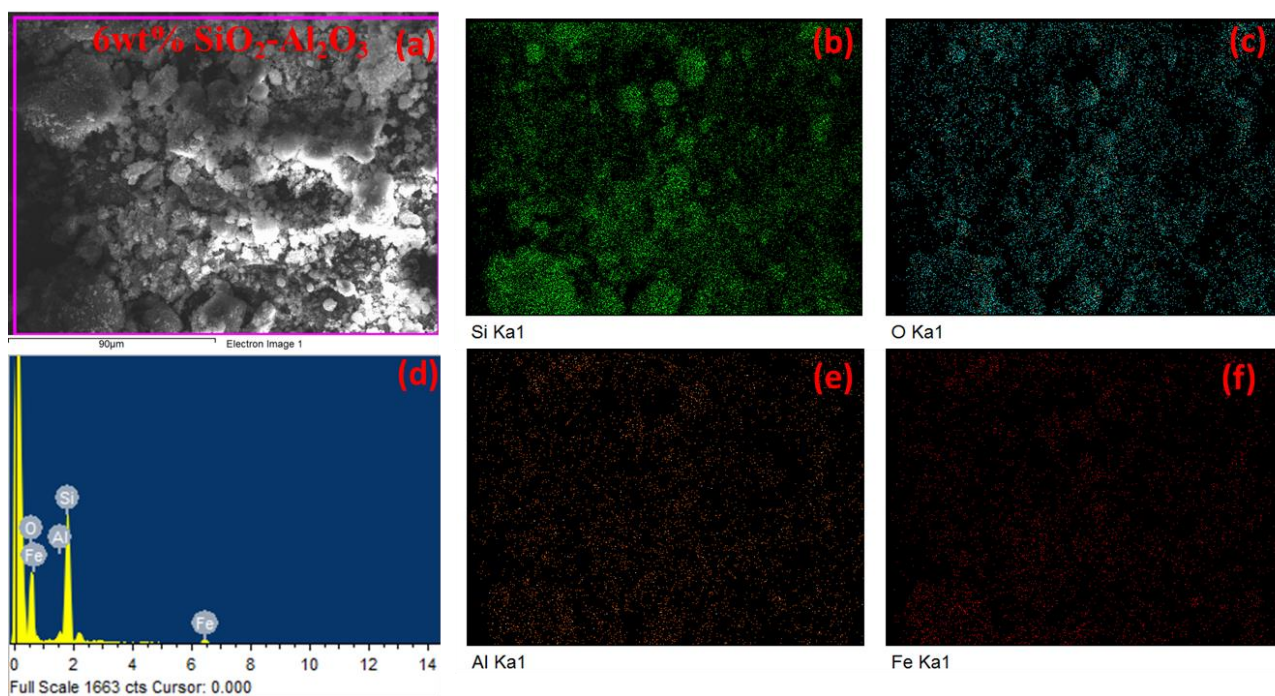

Figure S3: SEM-EDS elemental mapping of 6 wt% Fe/SiO<sub>2</sub>-Al<sub>2</sub>O<sub>3</sub> catalyst.



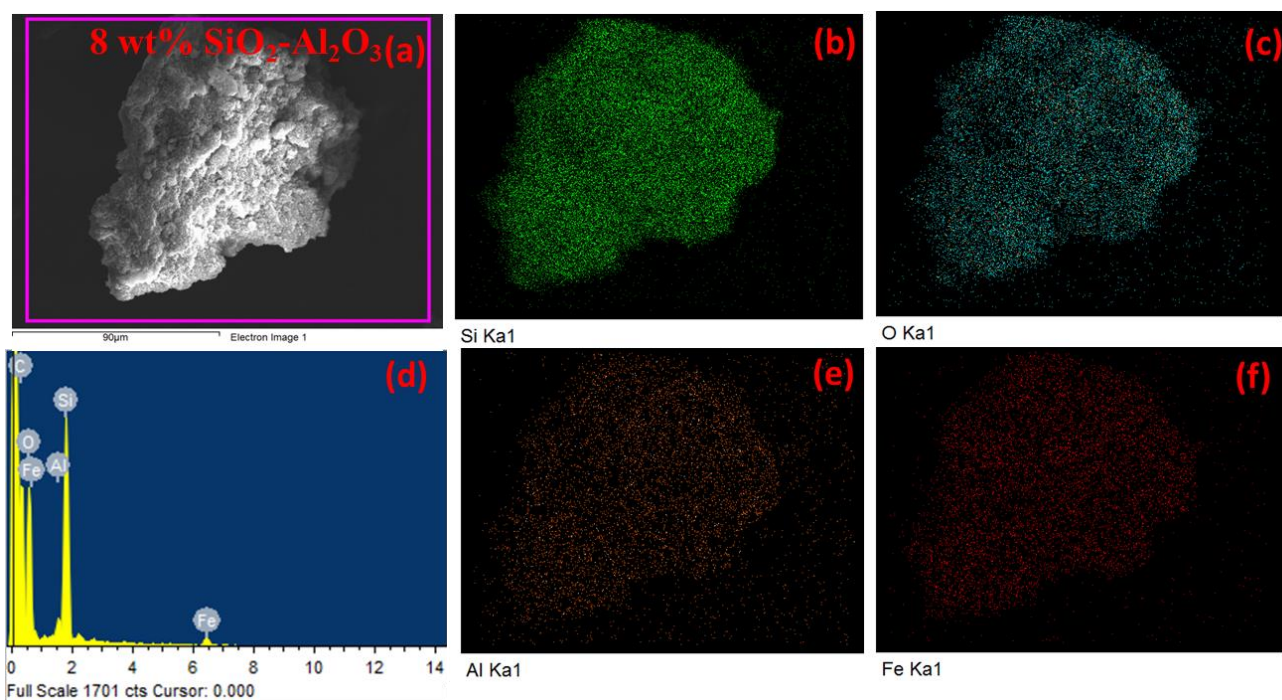

Figure S4: SEM-EDS elemental mapping of 8 wt% Fe/ $\text{SiO}_2\text{-Al}_2\text{O}_3$  catalyst.

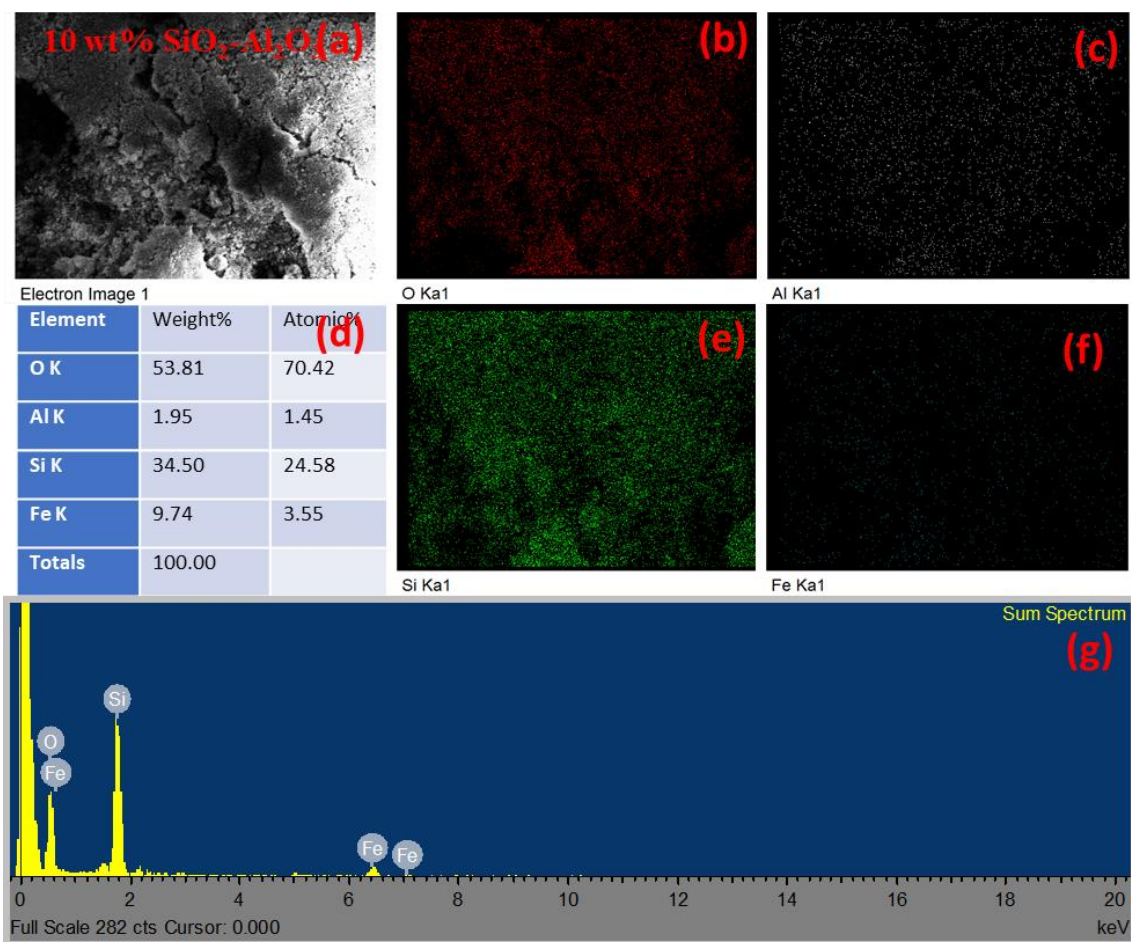

Figure S5: SEM-EDS elemental mapping of 10 wt% Fe/ $\text{SiO}_2\text{-Al}_2\text{O}_3$  catalyst

| Sr. No | Catalyst                                                  | Surface Area (m <sup>2</sup> g <sup>-1</sup> ) | Pore Volume (CC/g) | Pore Radius (nm) |
|--------|-----------------------------------------------------------|------------------------------------------------|--------------------|------------------|
| 1      | SiO <sub>2</sub> -Al <sub>2</sub> O <sub>3</sub>          | 213.86                                         | 0.280              | 3.59             |
| 1      | 4wt% Fe/SiO <sub>2</sub> -Al <sub>2</sub> O <sub>3</sub>  | 97.765                                         | 0.185              | 2.14             |
| 2      | 6wt% Fe/SiO <sub>2</sub> -Al <sub>2</sub> O <sub>3</sub>  | 89.237                                         | 0.094              | 1.93             |
| 3      | 8wt% Fe/SiO <sub>2</sub> -Al <sub>2</sub> O <sub>3</sub>  | 78.7111                                        | 0.0772             | 1.96             |
| 4      | 10wt% Fe/SiO <sub>2</sub> -Al <sub>2</sub> O <sub>3</sub> | 52.209                                         | 0.0432             | 1.65             |

Table S2: BET analysis surface area and porosity of Fe-loaded SiO<sub>2</sub>-Al<sub>2</sub>O<sub>3</sub> samples.

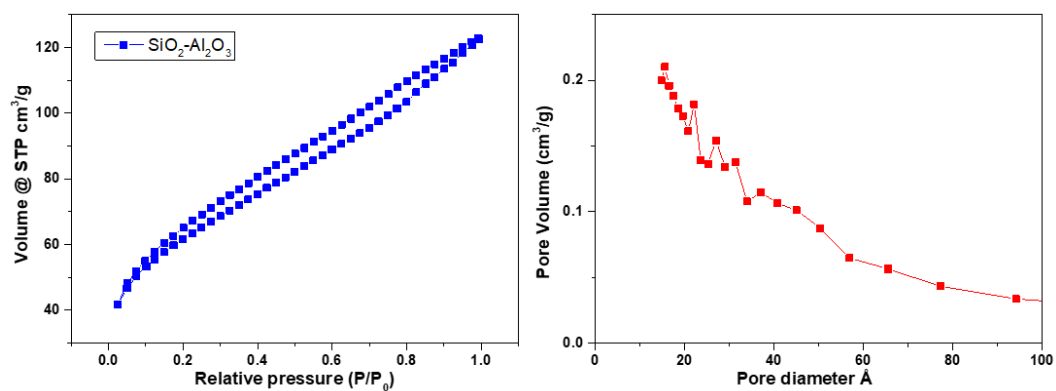

Figure S6. Nitrogen adsorption-desorption isotherm of SiO<sub>2</sub>/Al<sub>2</sub>O<sub>3</sub>.

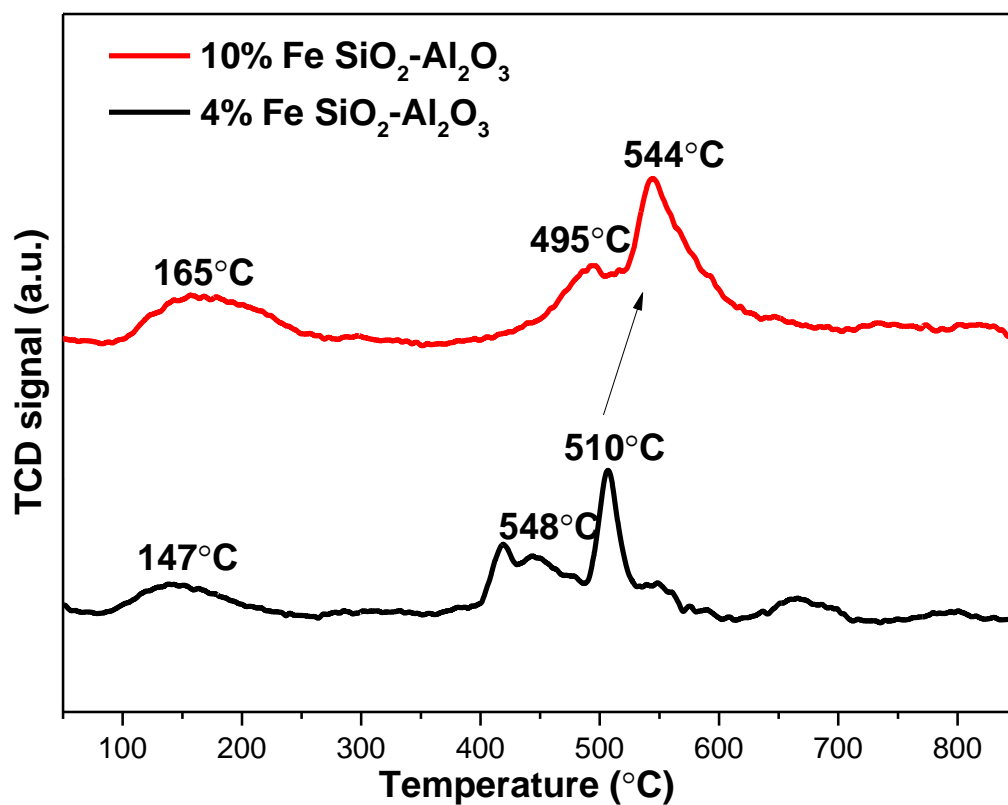

Figure S7: Temperature-programmed desorption of ammonia ( $\text{NH}_3$ -TPD) profiles of 10wt%  $\text{SiO}_2$ - $\text{Al}_2\text{O}_3$ .

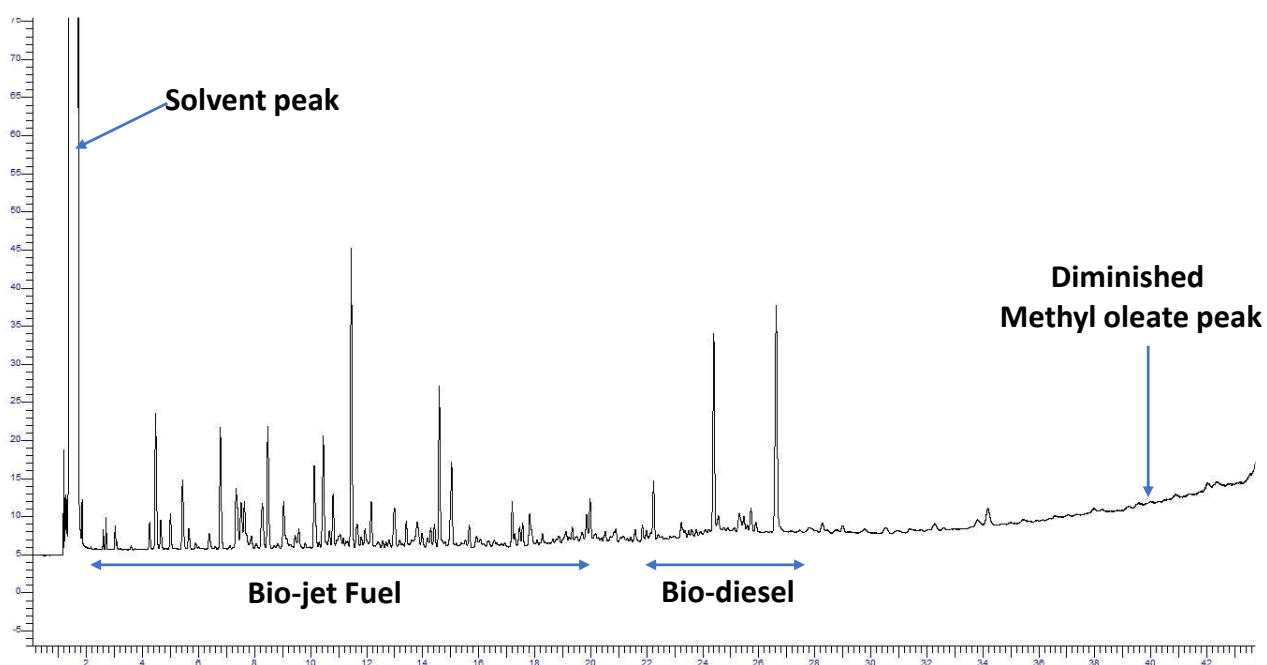

Figure S8: GC chromatogram of 10% Fe/ $\text{SiO}_2$ / $\text{Al}_2\text{O}_3$  catalyst at optimized reaction conditions (Entry 5).

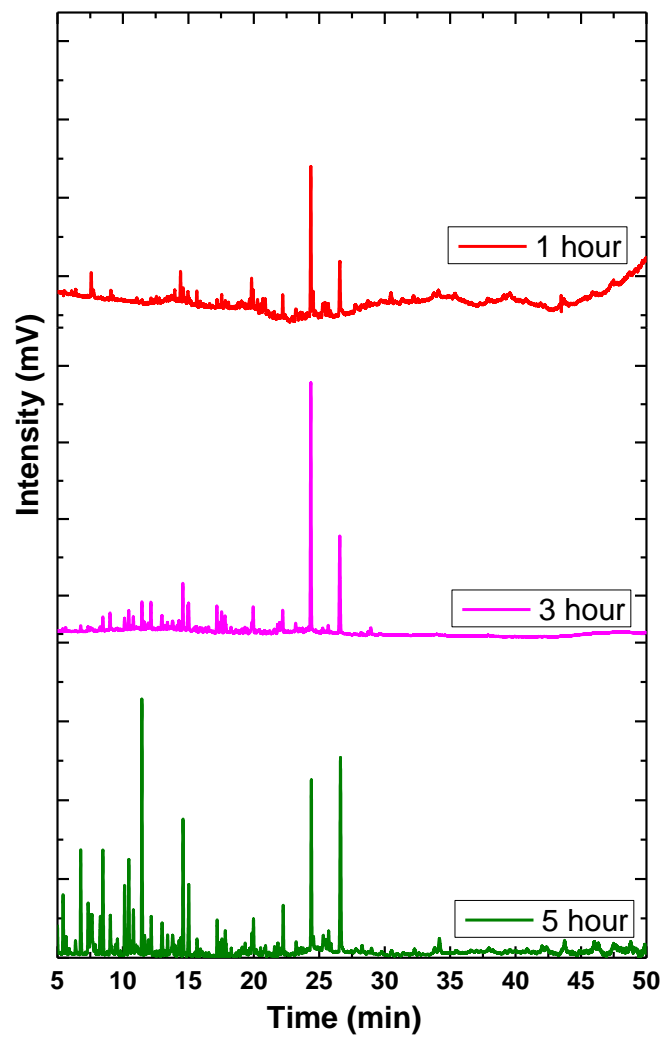

Figure S9: GC chromatograms of 10% Fe/SiO<sub>2</sub>-Al<sub>2</sub>O<sub>3</sub> catalyst at 1, 3 and 5 hours.



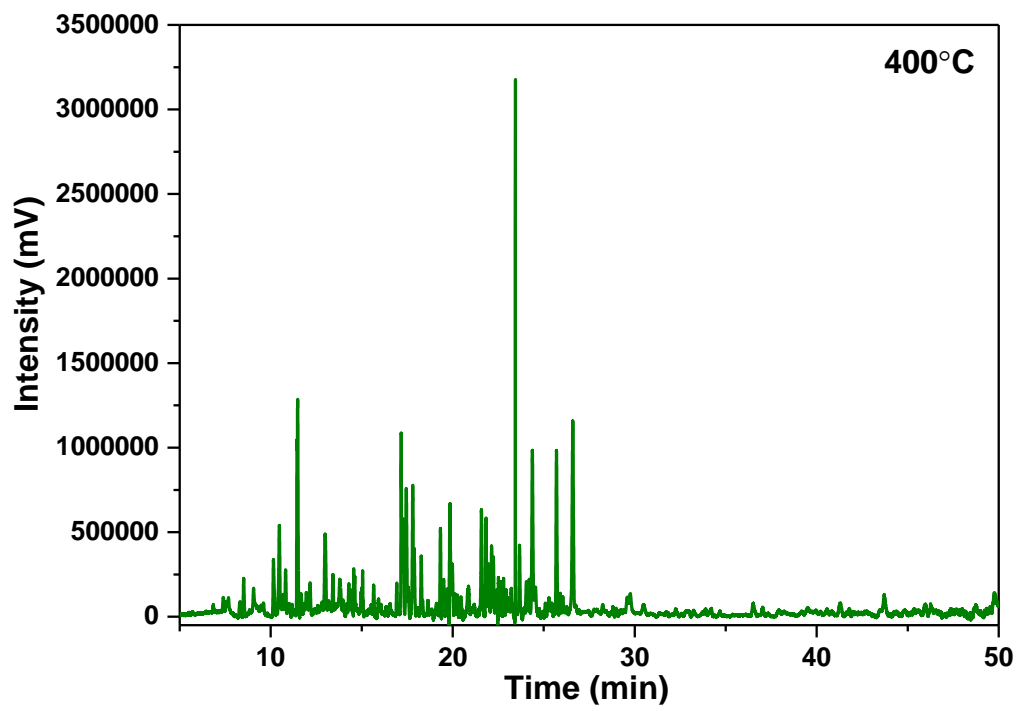

Figure S10: GC chromatograms of 10% Fe/SiO<sub>2</sub>-Al<sub>2</sub>O<sub>3</sub> catalyst at 400°C.

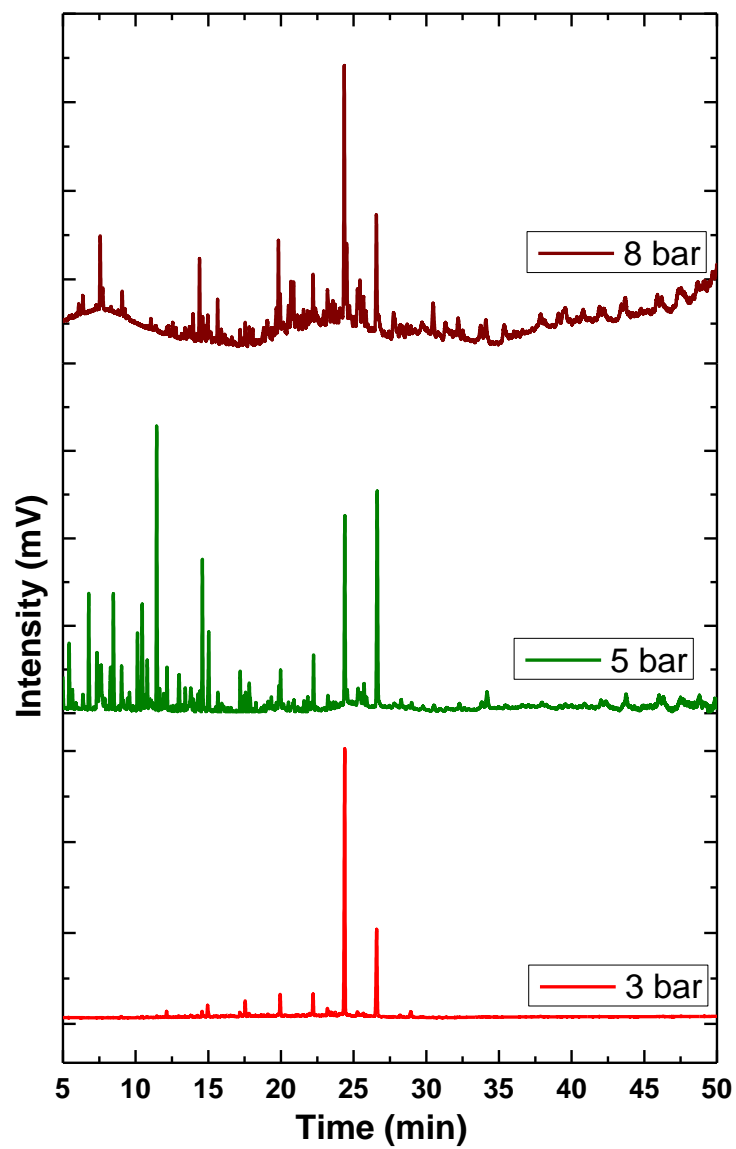

Figure S11: GC chromatograms of 10% Fe/SiO<sub>2</sub>-Al<sub>2</sub>O<sub>3</sub> catalyst at 3, 5 and 8 bar.

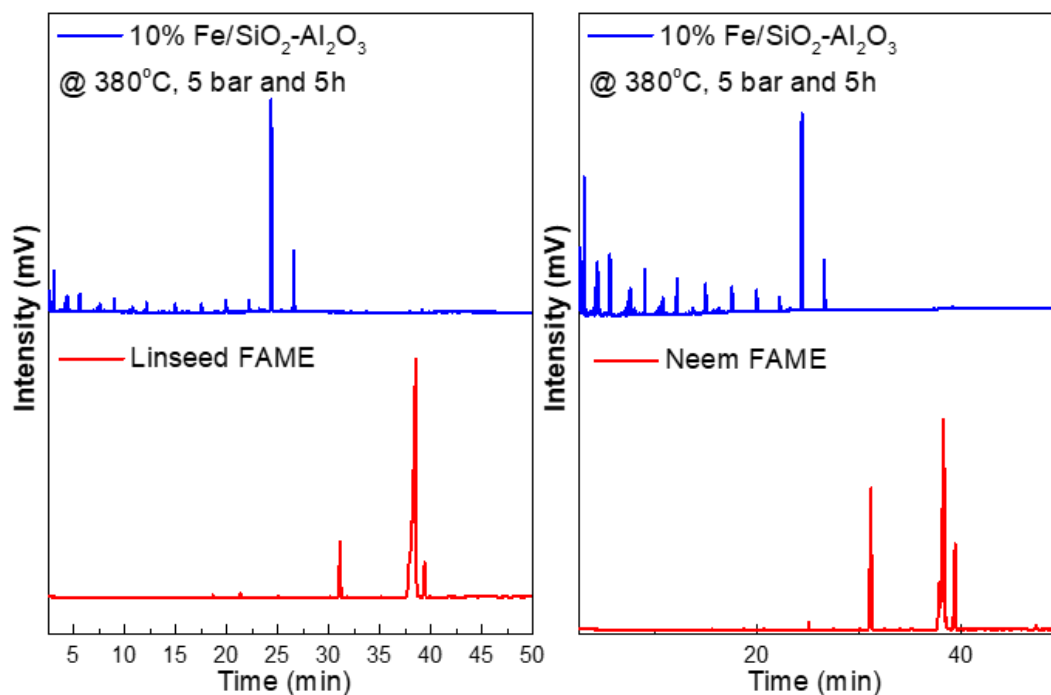

Figure S12: GC chromatograms of pure Linseed FAME and Neem FAME (red) and after hydrotreatment using 10% Fe/SiO<sub>2</sub>-Al<sub>2</sub>O<sub>3</sub> (Blue) at 380°C, 5 bar for 5h.

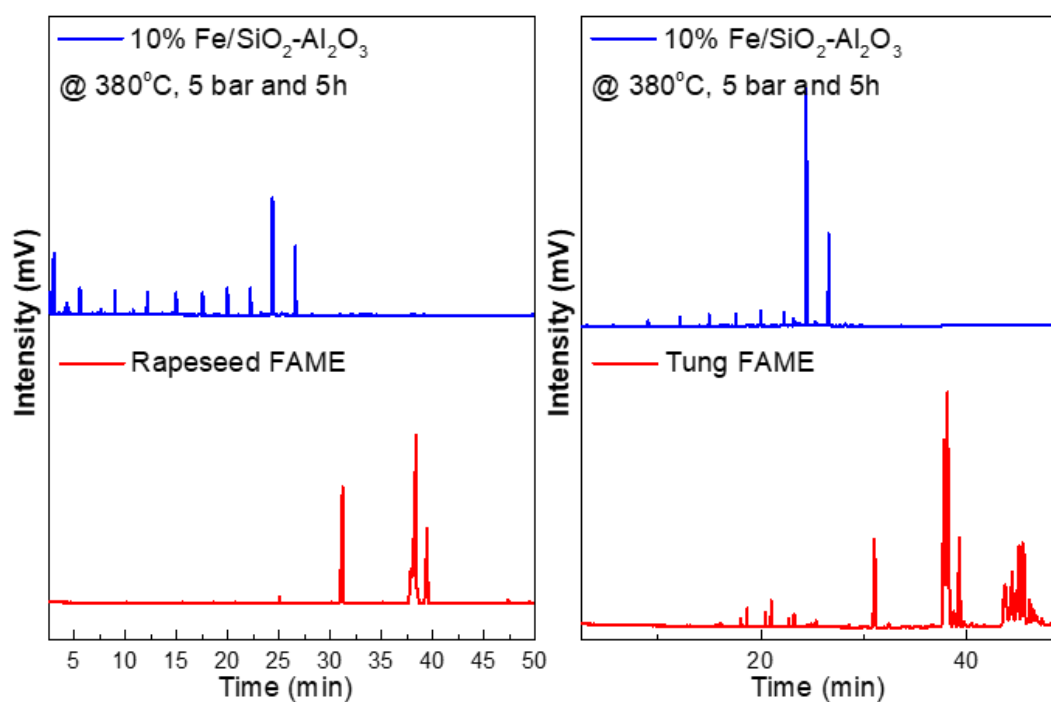

Figure S13: GC chromatograms of pure Rapeseed FAME and Tung FAME (red) and after hydrotreatment using 10% Fe/SiO<sub>2</sub>-Al<sub>2</sub>O<sub>3</sub> (Blue) at 380°C, 5 bar for 5h.

Table S3: The major compositions of palm oil, Rapeseed, Linseed, Neem, Soyabeen, Sunflower and Corn oil.

| <b>FAME/ Fatty acid profiles</b> | <b>Methyl palmitate (16:0)</b> | <b>Methyl stearate (18:0)</b> | <b>Methyl oleate (18:1)</b> | <b>Methyl linoleate (18:2)</b> | <b>Methyl linolenate (18:3)</b> |
|----------------------------------|--------------------------------|-------------------------------|-----------------------------|--------------------------------|---------------------------------|
| <b>Palm oil<sup>1</sup></b>      | 44                             | 4.5                           | 39.2                        | 10.1                           | 0.4                             |
| <b>Rapeseed<sup>2</sup></b>      | 4.8                            | 0.14                          | 62.73                       | 22.4                           | 7.50                            |
| <b>Linseed<sup>3</sup></b>       | 4.90-8.00                      | 2.24-4.59                     | 13.44-19.39                 | 12.25-17.44                    | 39.90-60.42                     |
| <b>Neem seed<sup>4</sup></b>     | 18.1                           | 18.1                          | 44.45                       | 18.3                           | 0.2                             |
| <b>Soyabeen<sup>1</sup></b>      | 11.0                           | 4.0                           | 23.4                        | 53.2                           | 7.8                             |
| <b>Sunflower<sup>1</sup></b>     | -                              | 4.5                           | 21.1                        | 66.2                           | -                               |
| <b>Corn<sup>1</sup></b>          | 6.5                            | 2.2                           | 27.5                        | 57.0                           | 0.9                             |

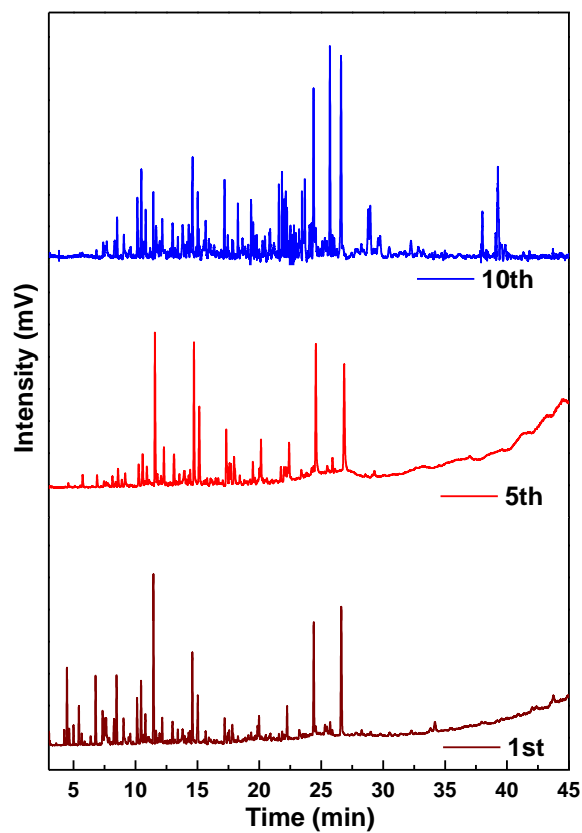

Figure S14: Reusability GC chromatograms of 10% Fe/SiO<sub>2</sub>-Al<sub>2</sub>O<sub>3</sub> catalyst up to 10 cycles.

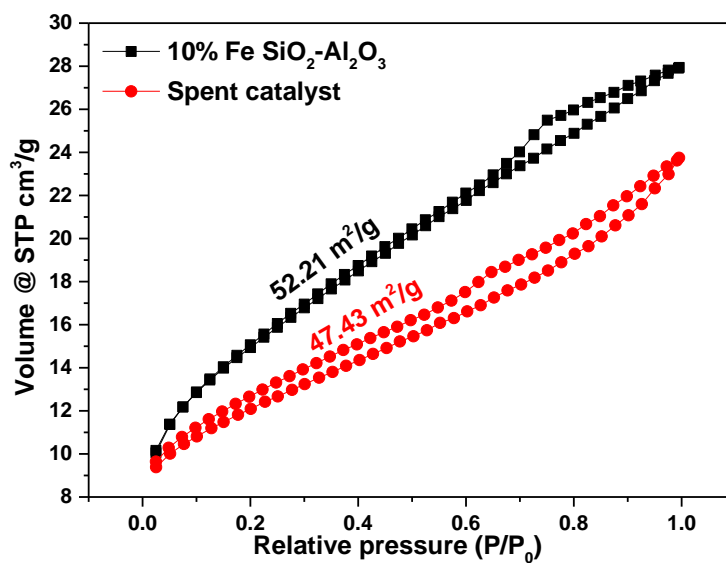



Figure S15. Nitrogen adsorption-desorption isothermal of SiO<sub>2</sub>/Al<sub>2</sub>O<sub>3</sub>.

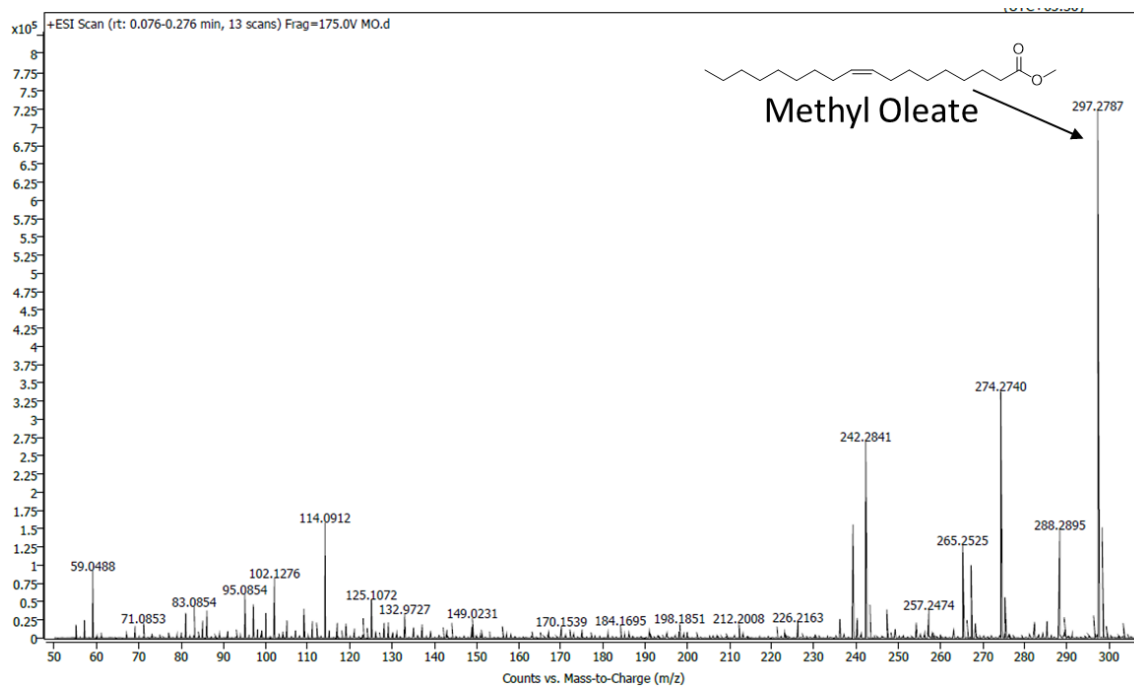

Figure S16: HRMS spectra of the pure methyl oleate spectra.

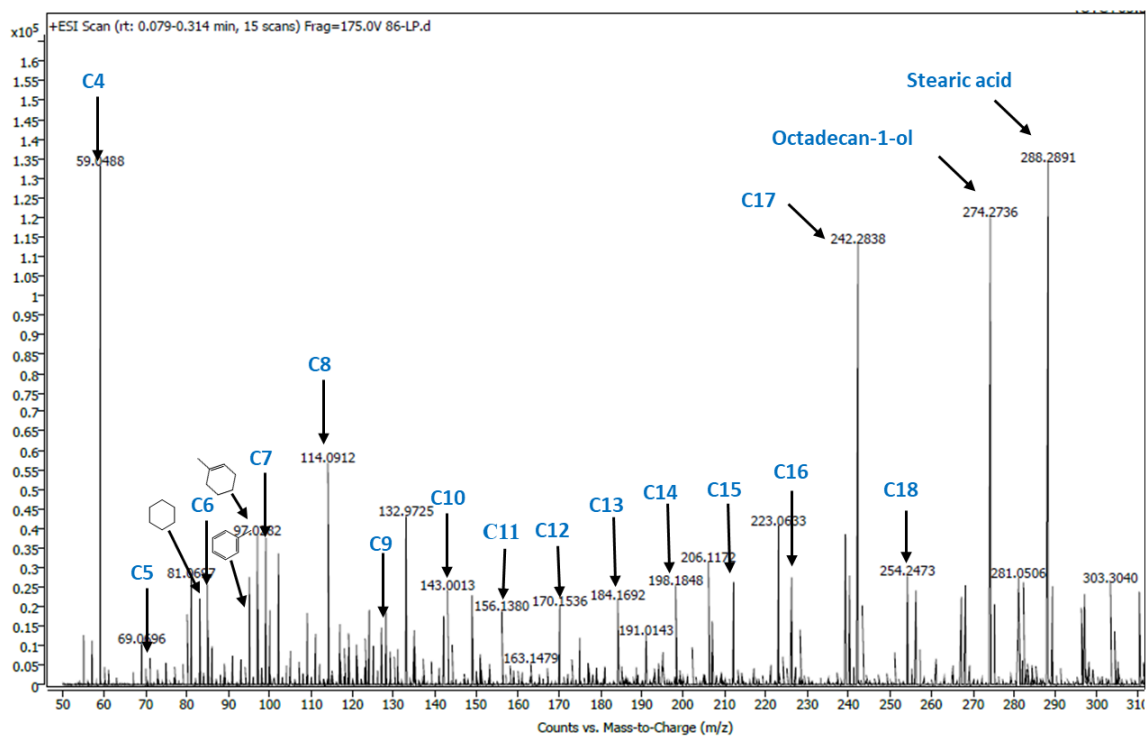

Figure S17: HRMS spectra of 10% Fe/SiO<sub>2</sub>-Al<sub>2</sub>O<sub>3</sub> catalyst at 5h of reaction condition.

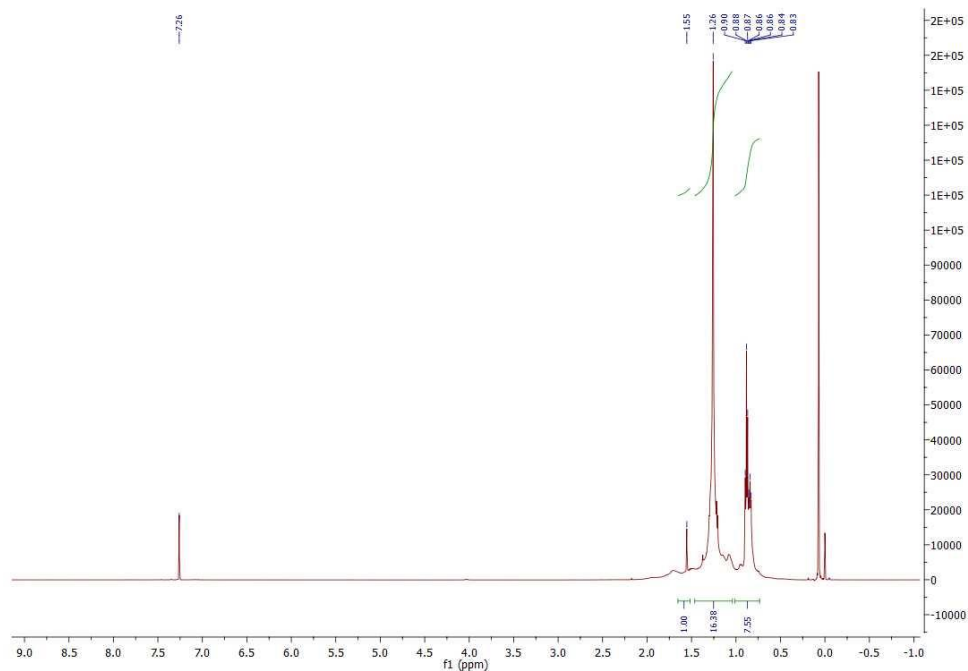

Figure S18:  $^1\text{H}$  NMR of the of catalytic hydrotreatment reaction using 10%  $\text{Fe}/\text{SiO}_2\text{-Al}_2\text{O}_3$  catalyst.

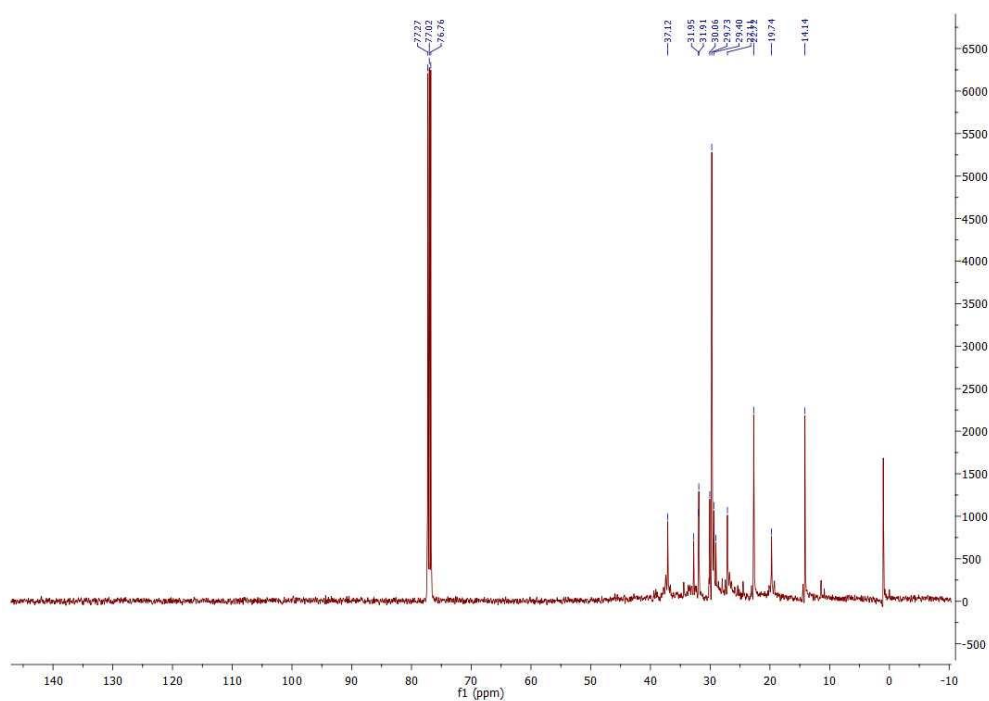

Figure S19:  $^{13}\text{C}$  NMR of the of catalytic hydrotreatment reaction using 10%  $\text{Fe}/\text{SiO}_2\text{-Al}_2\text{O}_3$  catalyst.

References:

1. D. O. Edem, *Plant Foods for Human Nutrition*, 2002, **57**, 319-341.
2. G. C. Cristea, D. Cazamir, D. Dima, C. Georgescu and L. Deleanu, *IOP Conference Series: Materials Science and Engineering*, 2018, **444**, 022011.
3. J. Campos, P. Severino, C. Ferreira, A. Zielińska, A. Santini, S. Souto and E. B. Souto, *Current medicinal chemistry*, 2019.
4. E. Aransiola, E. Betiku, I. Dio and T. Ojumu, *Afr J Biotechnol*, 2012, **11**, 6178-6186.
